# Supplementary material
Source: bioRxiv or medRxiv preprint supplement (https://www.biorxiv.org/highwire/filestream/51984/field_highwire_adjunct_files/9/173823-9.pdf)

A

## Species that provided the template for mapping to either ortholog belonging to module M00252

Facet labels are [group, individual, KO]

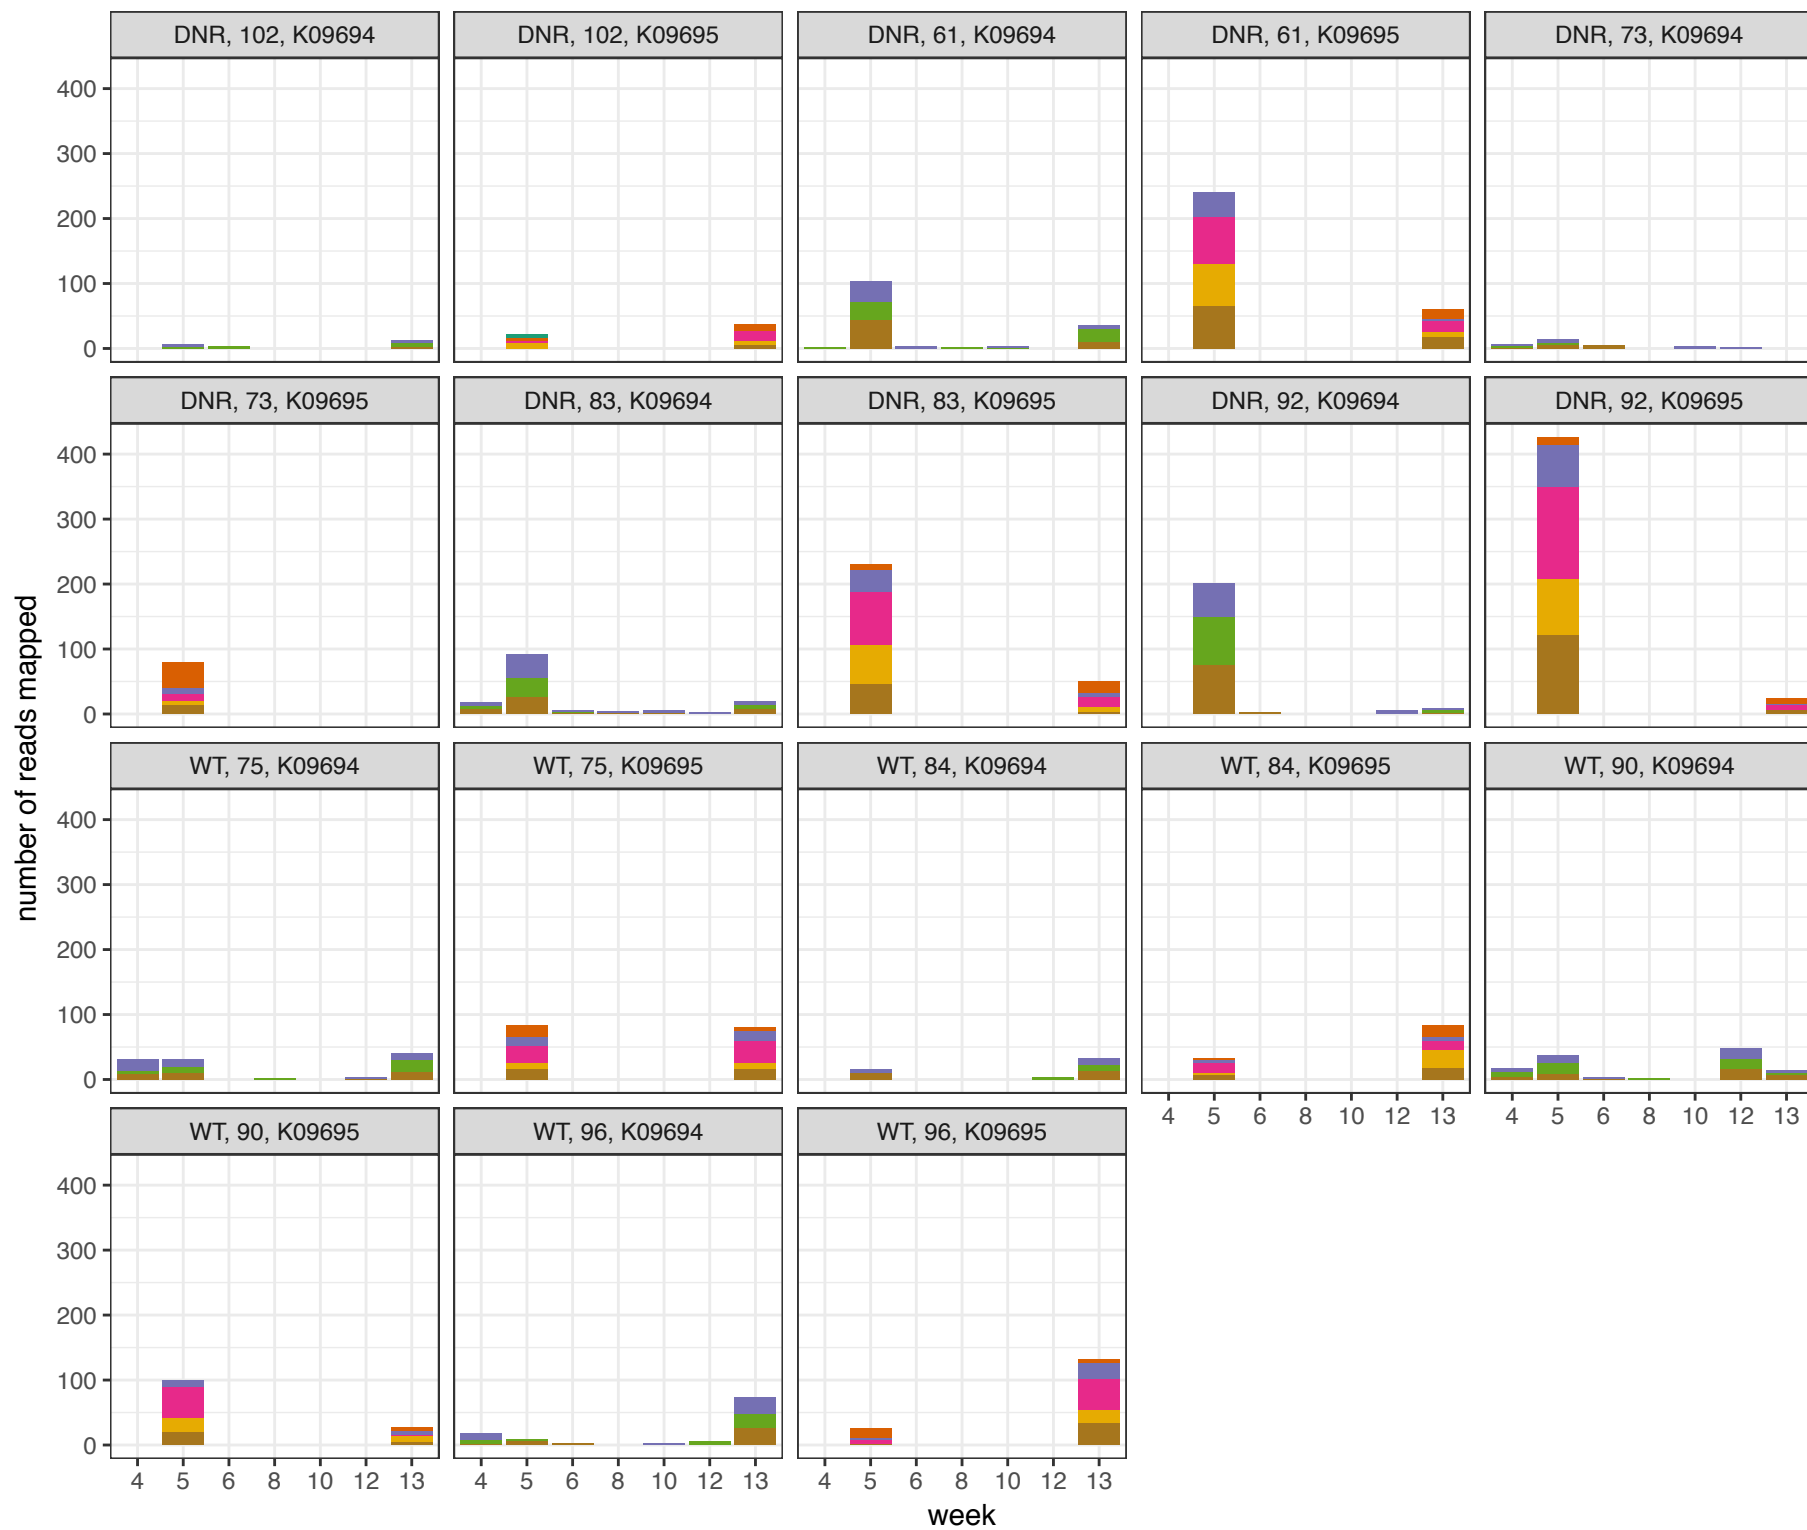

B

## Distance covariance values and significance of permutation test comparing M00252's KO trajectories with all species trajectories

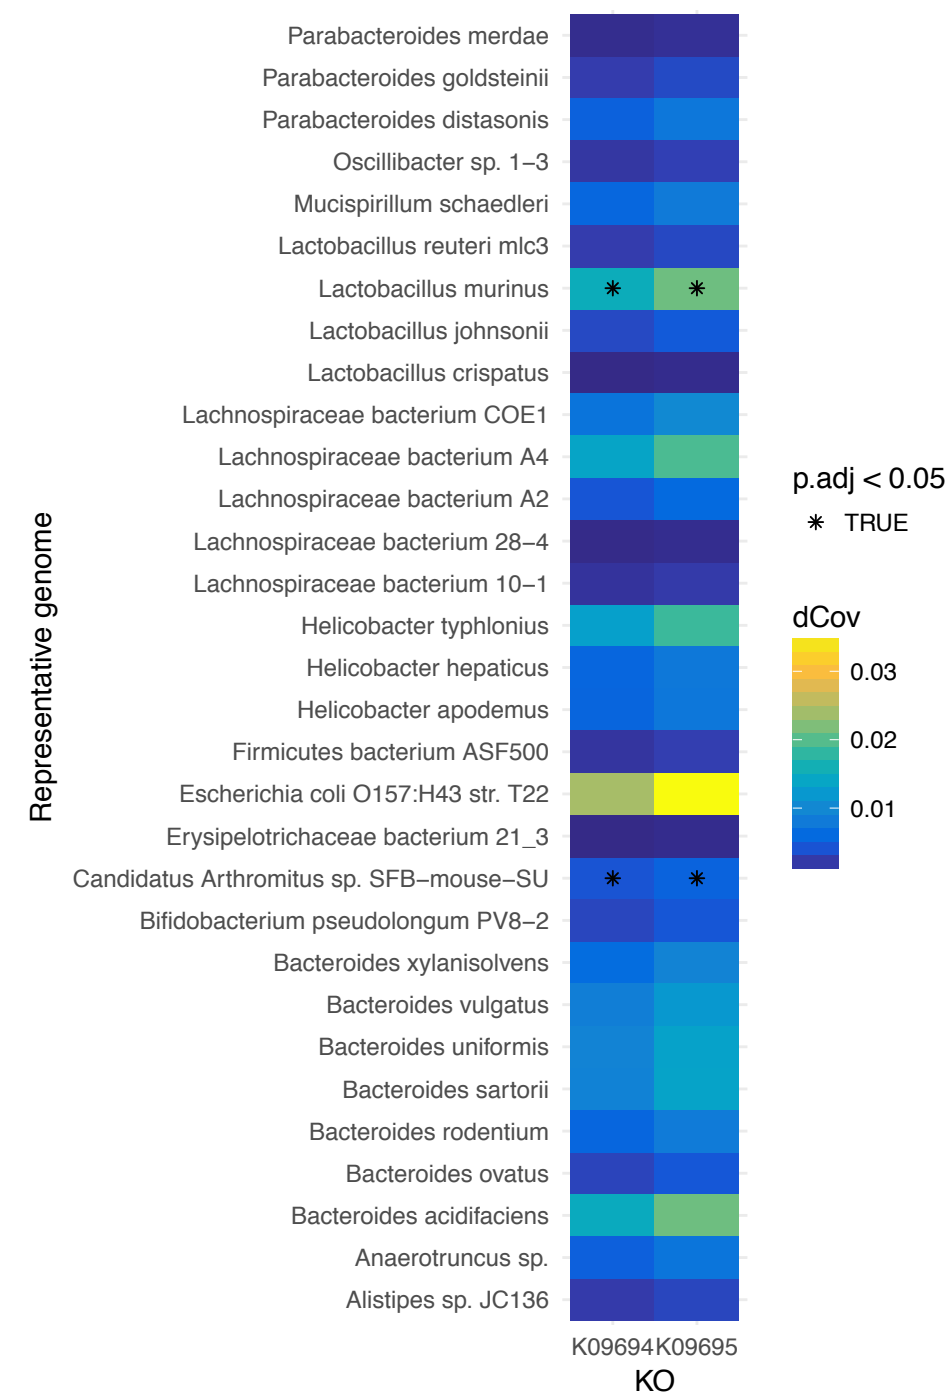

Supplement: Supplementary file [file 173823-9.pdf]
